# Supplementary material for: Hydrodynamic electrospray ionization jetting of calcium alginate particles: effect of spray-mode, spraying distance and concentration
Source: Royal Society of Chemistry journal article supplement (doi:10.1039/c8ra03490g), 2018-01-01
Supplement: c8ra03490g1.pdf [file c8ra03490g1.pdf]

## Supporting Information of: Hydrodynamic Electro spray Ionization Jetting of Calcium Alginate Particles: Effect of Spray-Mode, Spraying Distance and Concentration

Sven Rutkowski,<sup>a</sup> Tiejian Si,<sup>\*a</sup> Meiyu Gai,<sup>b,c</sup> Johannes Frueh,<sup>\*a,c</sup> Qiang He<sup>\*a</sup>

<sup>a</sup>Micro/Nanotechnology Research Center, Harbin Institute of Technology, Yikuang Street 2 B1, Harbin 150080, P.R. China

<sup>b</sup>School of Engineering and Materials Science, Queen Mary University of London, Mile End, Eng, 215, London E1 4NS, United Kingdom

<sup>c</sup>National Research Tomsk Polytechnic University, 634050 Tomsk, Russian Federation

\*Corresponding Authors: [tieyansi@hit.edu.cn](mailto:tieyansi@hit.edu.cn), [Johannes.Frueh@hit.edu.cn](mailto:Johannes.Frueh@hit.edu.cn); [qianghe@hit.edu.cn](mailto:qianghe@hit.edu.cn)

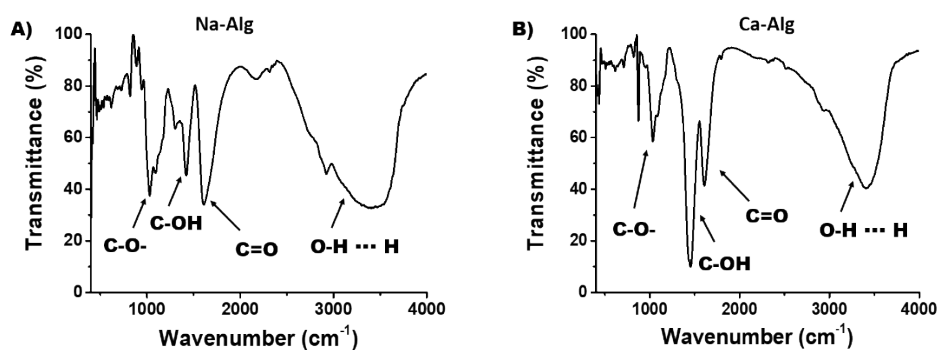

**Fig. S1** A) FT-IR spectrum of sodium alginate (Na-Alg). B) FT-IR spectrum of calcium alginate (Ca-Alg). Absorption bands determined according to the data table outlined in references.<sup>1</sup>

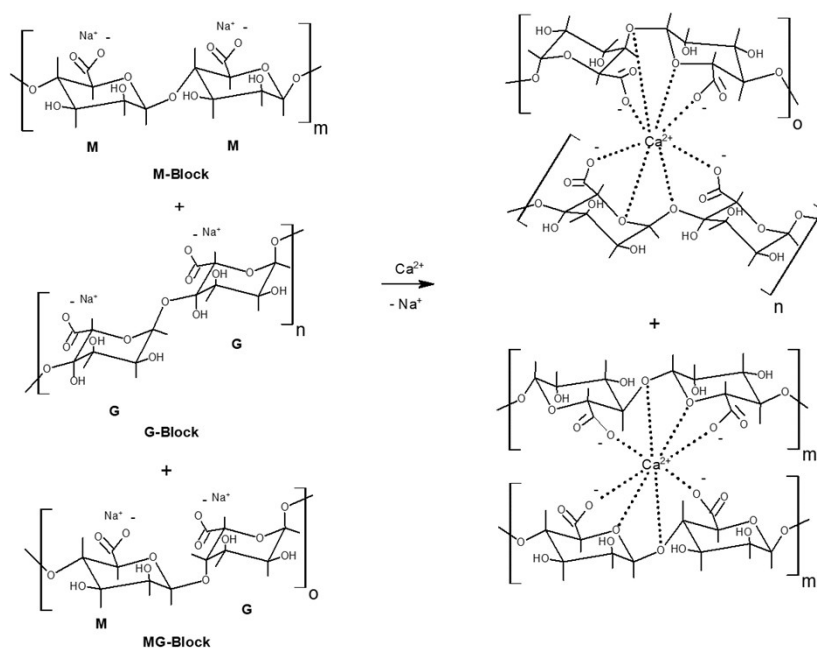

**Fig. S2** Illustration of the sodium alginate (Na-Alg) cross-linking process with  $\text{Ca}^{2+}$  to calcium alginate (Ca-Alg) (G –  $\alpha$ -L-guluronic acid block, M –  $\beta$ -D-mannuronic acid block, MG – M + G mixed block).

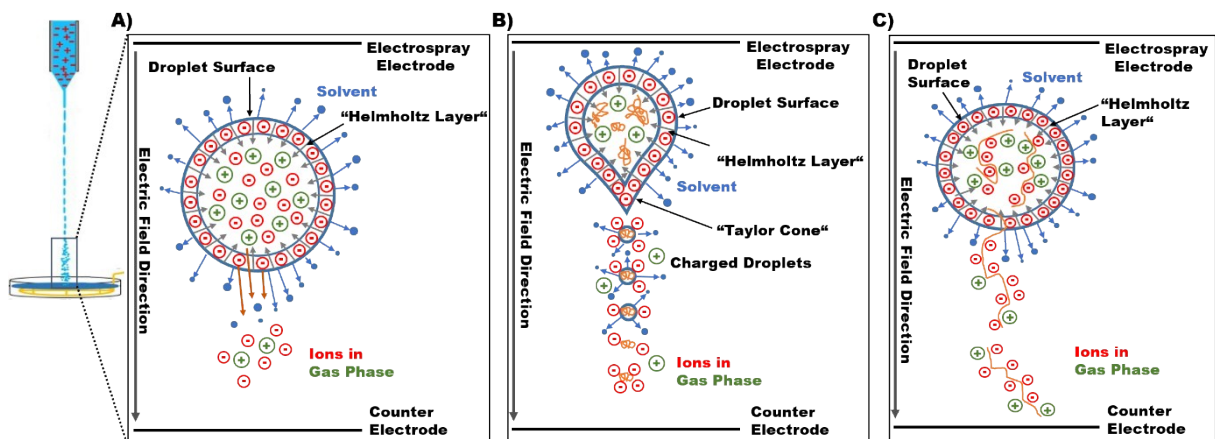

**Fig. S3** Visualization of the release mechanism in step 3 main paper (Section: Methods and Materials - Different spray modes in ES jetting process), with **A)** ion evaporation model (IEM), **B)** charge residue model (CRM) and **C)** chain ejection model (CEM).

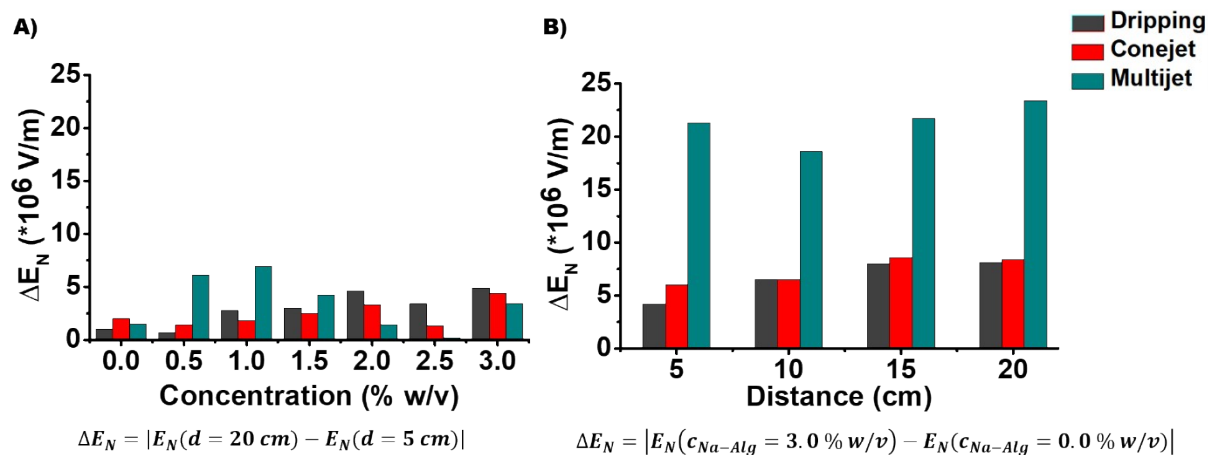

**Fig. S4 A)**  $\Delta E_N$  is absolute value of  $E_N$  at  $c_{Na-Alg} = 3.0 \% w/v$  minus absolute value of  $E_N$  at  $c_{Na-Alg} = 0.0 \% w/v$  (only solvent Water: Ethanol = 8:2) against distance  $d$  (cm). **B)**  $\Delta E_N$  is absolute value of  $E_N$  at  $d = 20$  cm minus absolute value of  $E_N$  at  $d = 5$  cm against  $c_{Na-Alg}$  (% w/v).

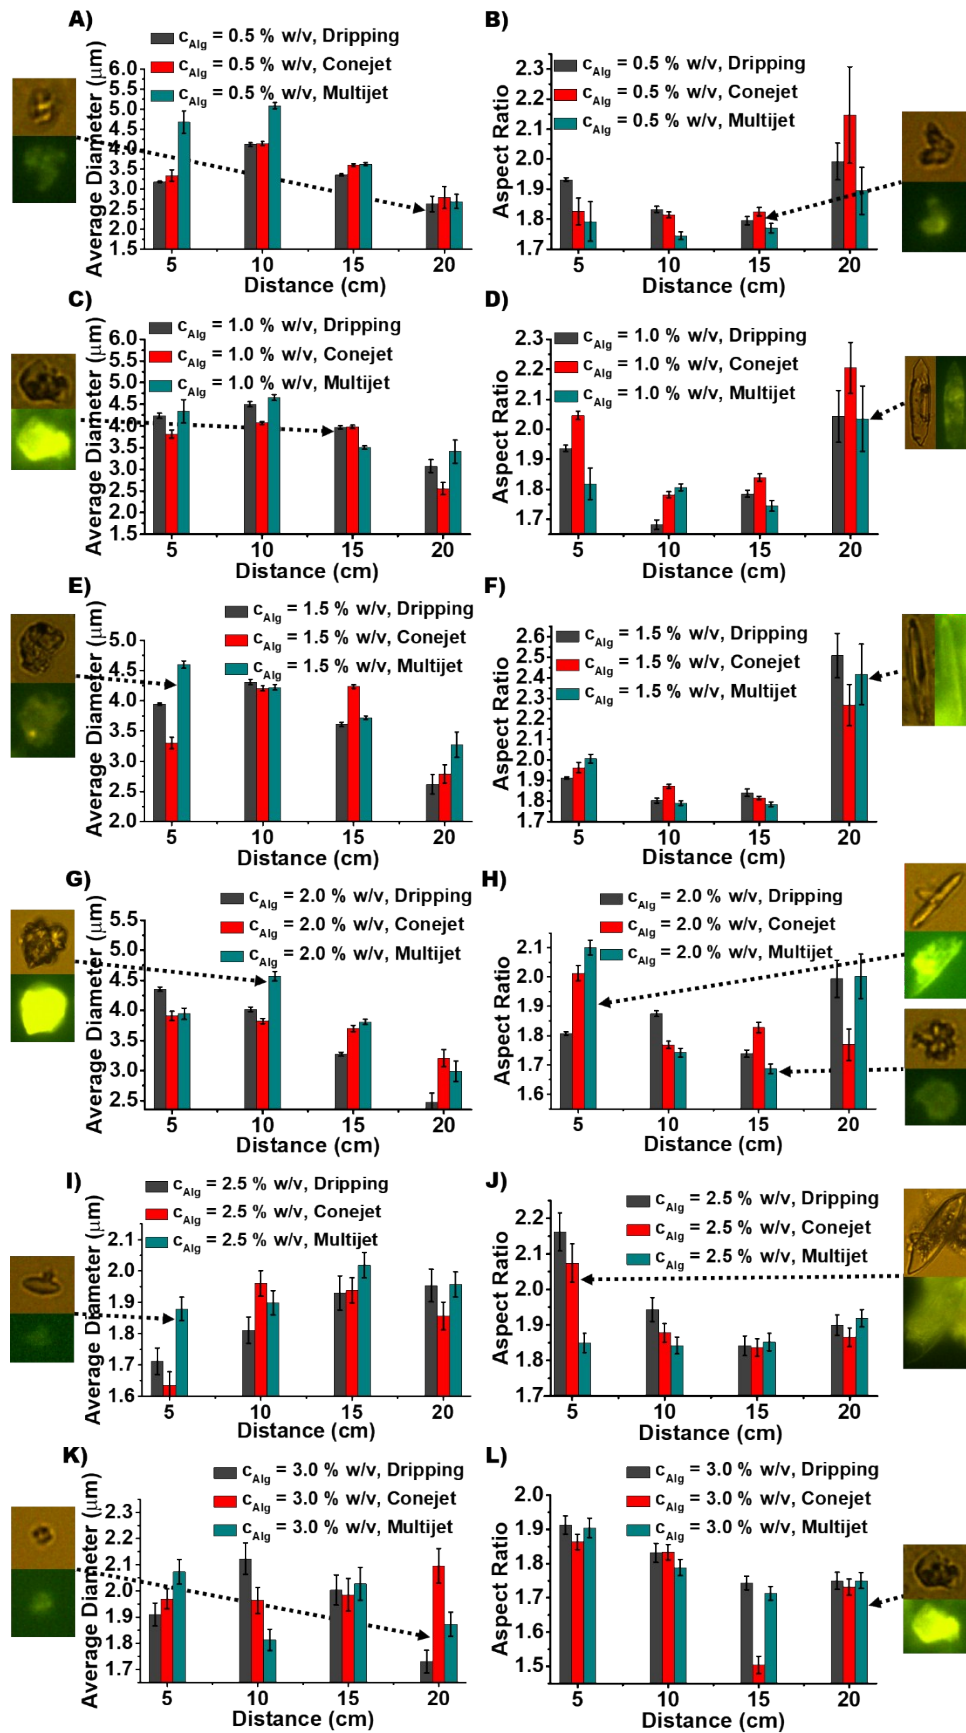

**Fig. S5** A), C), E), G), I), K) Average diameter ( $\mu\text{m}$ ) vs. distance (cm) with increasing  $c_{\text{Na-Alg}}$  (% w/v) and B), D), F), H), J), L) Aspect ratio vs. distance (cm) with increasing  $c_{\text{Na-Alg}}$  (% w/v). The inset images were acquired with a microscope Olympus IX71 and cropped to different scale bars. All plotted error bars are representing the standard error.

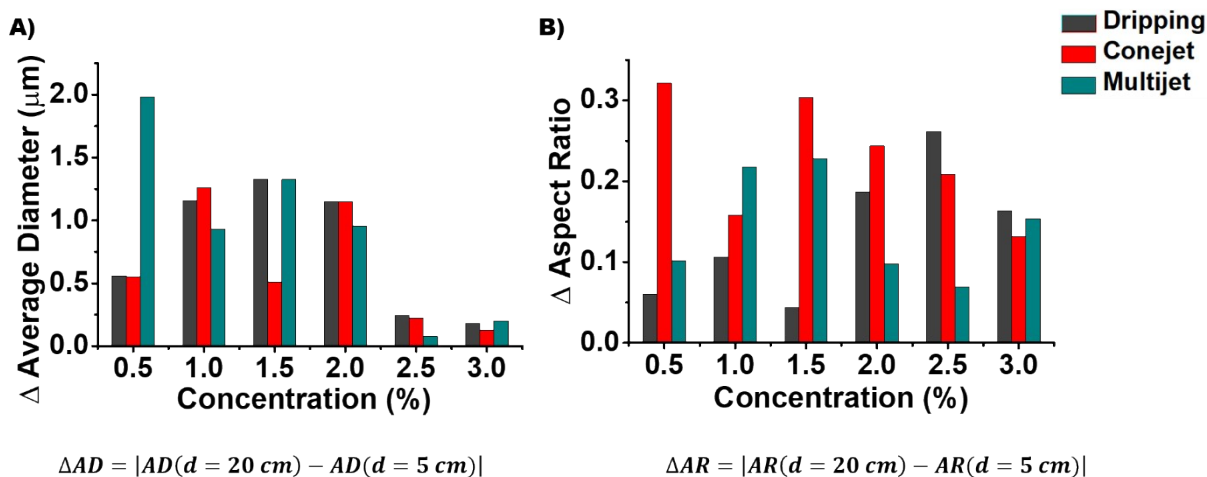

**Fig. S6 A)**  $\Delta$  Average diameter ( $\Delta AD$ ) is absolute value of average diameter at  $d = 20$  cm minus absolute value of average diameter at  $d = 5$  cm against  $c_{\text{Na-Alg}}$  (% w/v). **B)**  $\Delta$  Aspect ratio ( $\Delta AR$ ) is absolute value of aspect ratio at  $d = 20$  cm minus absolute value of aspect ratio at  $d = 5$  cm against  $c_{\text{Na-Alg}}$  (% w/v).

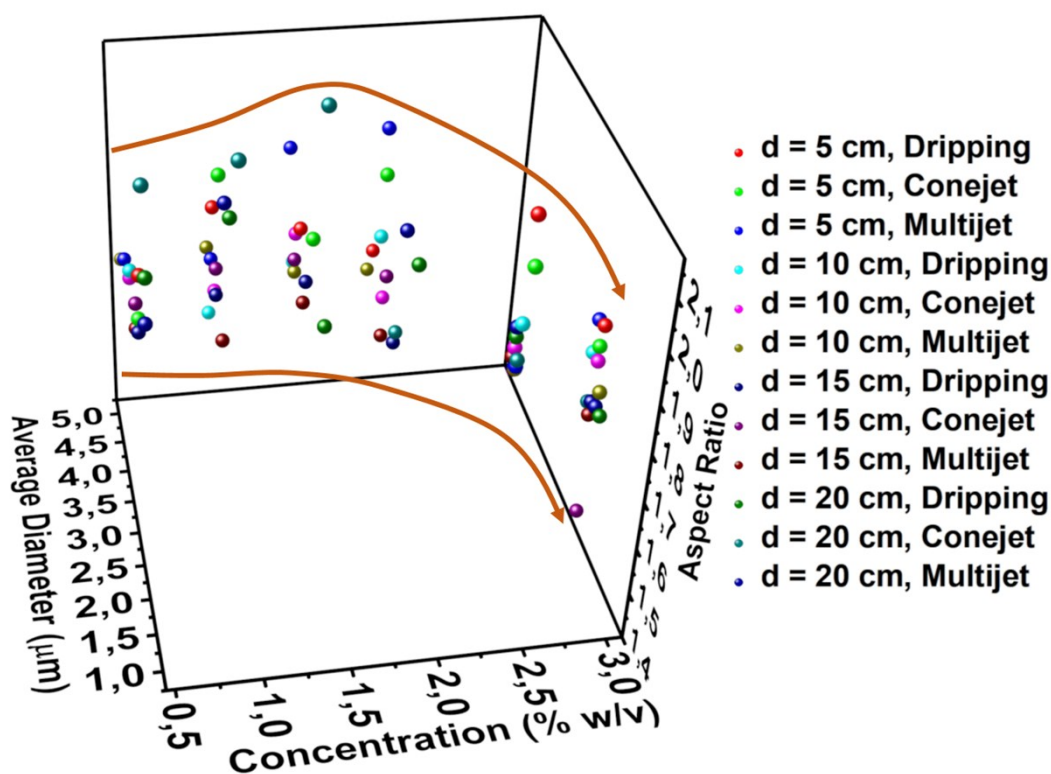

**Fig. S7** Three dimensional plot of Average diameter ( $\mu\text{m}$ ) vs.  $c_{\text{Na-Alg}}$  (% w/v) vs. aspect ratio for the three applied electrospay modes. The two dark orange colored arrows are guiding the eyes.

## Supporting References

- 1 M. Hesse, H. Meier, B. Zeeh, *Georg Thieme Verlag Stuttgart*, 1995, **5. Revised Edition**, 364 pages, ISBN: 3-13-576105-3.
